# Supplementary material for: The Cellular Composition of Bovine Coccygeal Intervertebral Discs: A Comprehensive Single-Cell RNAseq Analysis
Source: MDPI journal article supplement (doi:10.3390/ijms22094917), 2021-05-06
Supplement: s1 [file s1]

## Supplementary Materials:

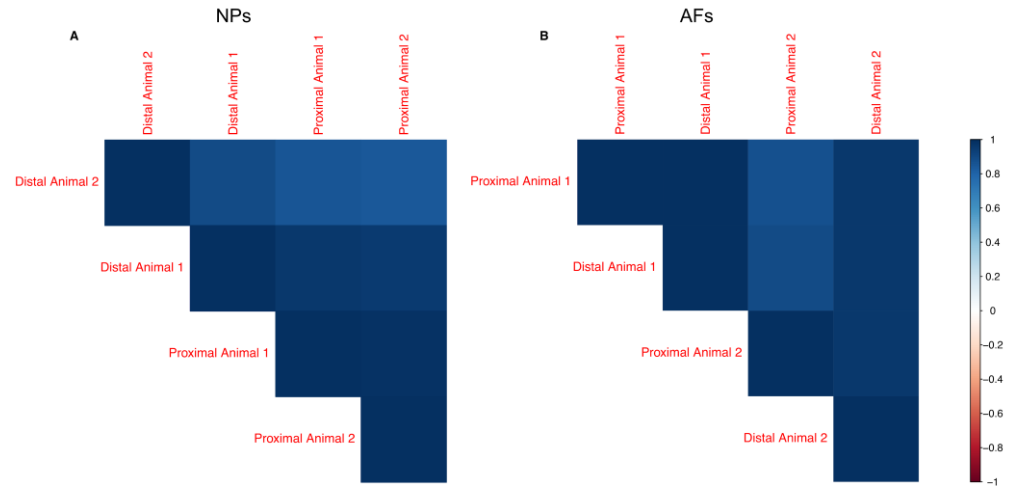

**Figure S1.** Correlation matrix NPs and AFs for scRNAseq. The matrix shows how correlated the NPs samples and the AFs samples are within the group. The darker is the blue, the higher is the correlation. (A) depicts the correlation between transcriptomes of two animals at different levels in the nucleus pulposus. (B) depicts the correlation between transcriptomes of two animals at different levels in the annulus fibrosus.

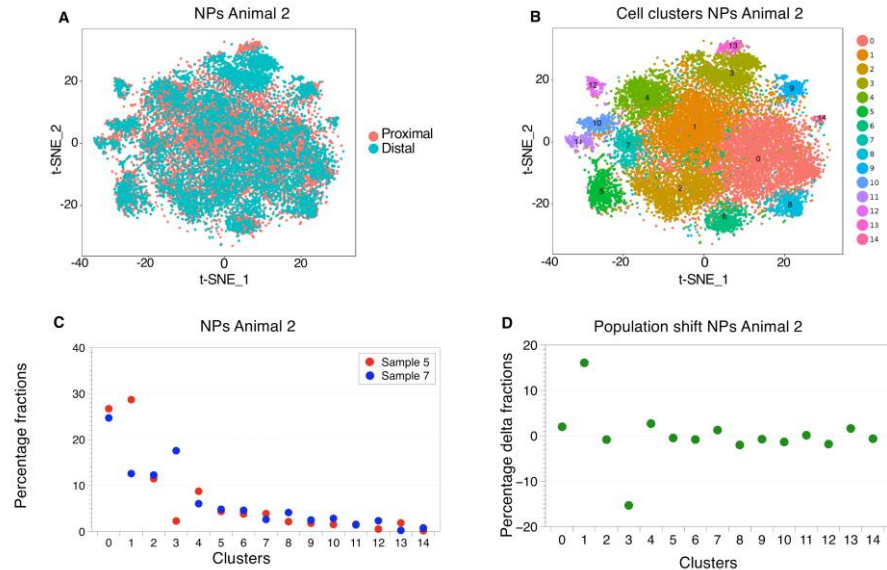

**Figure S2.** Cell cluster distributions between proximal and distal NPs Animal 2. The first t-SNE plot (A) provides a visual measure for similarity for the proximal and distal NPs. The graphical overlap stands for the amount of similarity in gene expression profiles of the distal and proximal NPs. The second t-SNE plot (B) shows the identified cell clusters. (C) The population sized within a cell cluster. The first bar plot (C) is a representation of the percentage of the fractions of cells per cluster, normalized to the total amount of cells in each corresponding sample (see Table S3 for the original data). The population shift observed between the proximal and the distal samples is described in terms of number of cells that compose a cluster in each sample. (D) The difference in percentage between the cell cluster sizes of the proximal and distal NPs, indicating the amount of correlation between the samples.

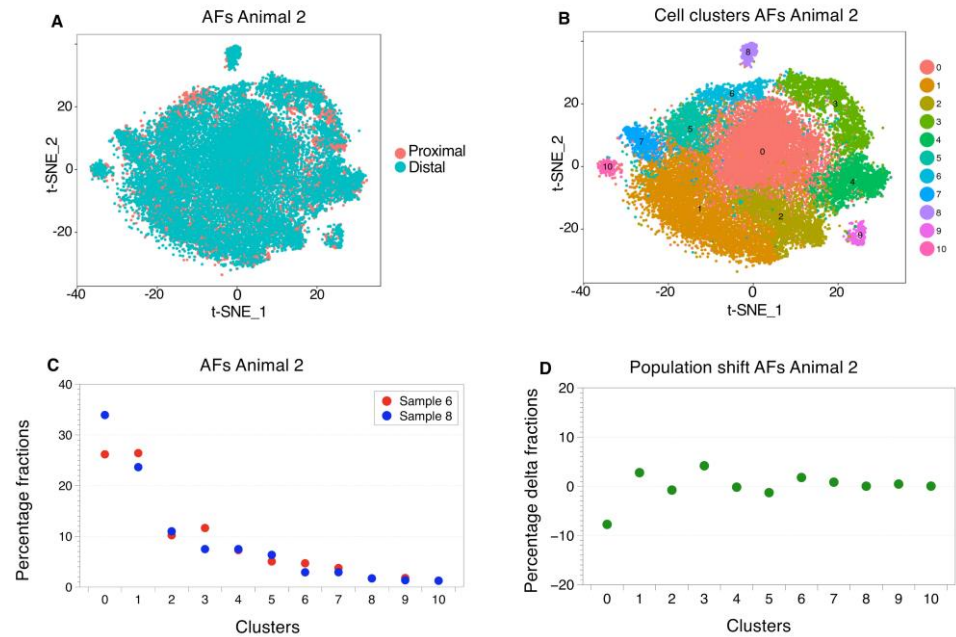

**Figure S3.** Cell cluster distributions between proximal and distal AFs Animal 2. The first t-SNE plot (**A**) provides a visual measure for similarity for the proximal and distal AFs. The graphical overlap stands for the amount of similarity in gene expression profiles of the distal and proximal AFs. The second t-SNE plot (**B**) shows the identified cell clusters. (**C**) The population sized within a cell cluster. The first bar plot (**C**) is a representation of the percentage of the fractions of cells per cluster, normalized to the total amount of cells in each corresponding sample (see Table S4 for the original data). The population shift observed between the proximal and the distal samples is described in terms of number of cells that compose a cluster in each sample. (**D**) The difference in percentage between the cell cluster sizes of the proximal and distal NPs, indicating the amount of correlation between the samples.

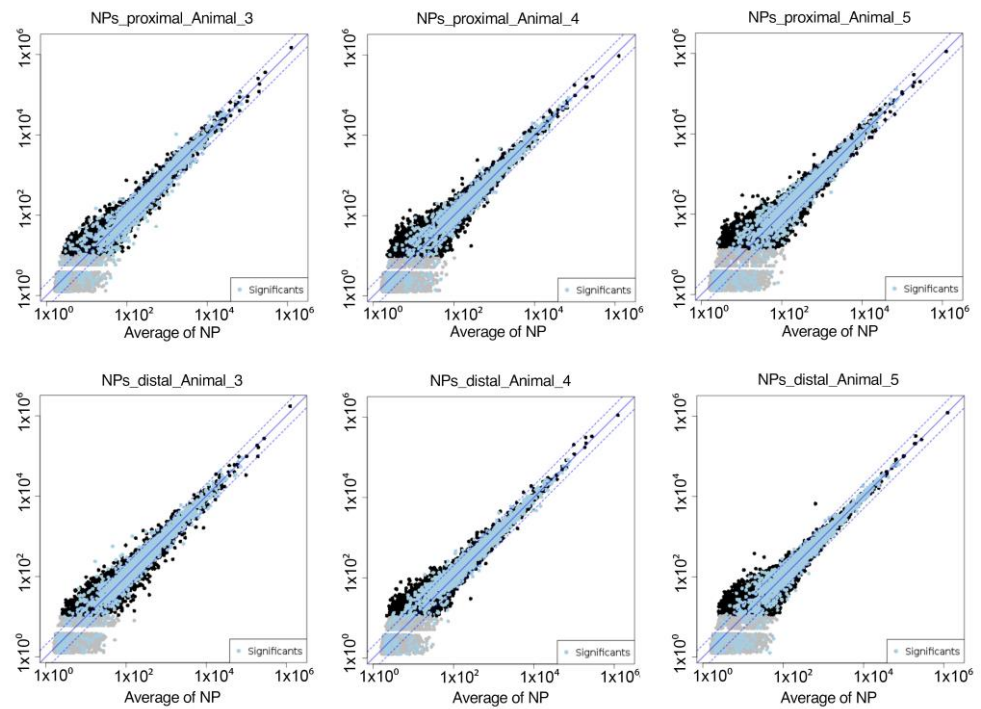

**Figure S4.** Linear correlation among the NPs samples in the bulk RNAseq. In the matrix, each samples is correlated with the average of the group.

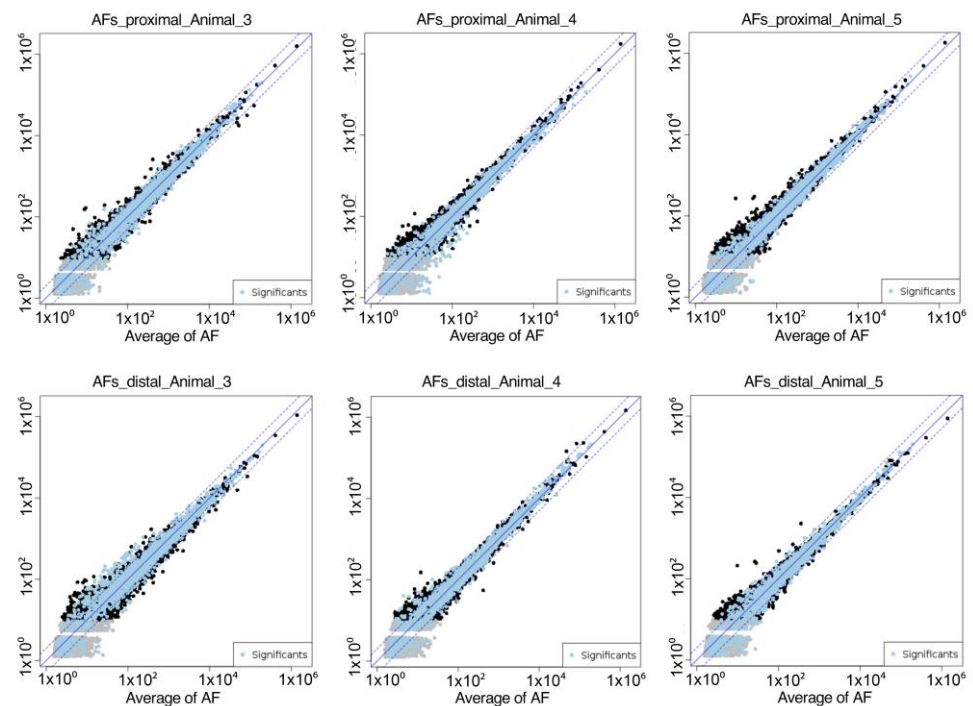

**Figure S5.** Linear correlation among the AFs samples in the bulk RNAseq. In the matrix, each samples is correlated with the average of the group.

**Table S1.** Cells per cluster and samples fractions NPs in Animal 1. Sample 1 represents the proximal NPs in Animal 1 and Sample 3 represents the distal NPs in Animal 1.

| Number of cells in each cluster |            |         |         |                  |                  |
|---------------------------------|------------|---------|---------|------------------|------------------|
| Cluster                         | # of cells | Sample1 | Sample3 | Sample1 fraction | Sample3 fraction |
| 0                               | 5634       | 2084    | 3550    | 0.2141829        | 0.2883132        |
| 1                               | 5532       | 2701    | 2831    | 0.2775951        | 0.2299196        |
| 2                               | 2874       | 1086    | 1788    | 0.1116136        | 0.1452124        |
| 3                               | 2275       | 1050    | 1225    | 0.1079137        | 0.0994883        |
| 4                               | 1078       | 498     | 580     | 0.0511819        | 0.0471047        |
| 5                               | 903        | 352     | 551     | 0.0361768        | 0.0447495        |
| 6                               | 843        | 559     | 284     | 0.0574512        | 0.0230651        |
| 7                               | 688        | 321     | 367     | 0.0329908        | 0.0298059        |
| 8                               | 550        | 242     | 308     | 0.0248715        | 0.0250142        |
| 9                               | 461        | 180     | 281     | 0.0184995        | 0.0228214        |
| 10                              | 340        | 174     | 166     | 0.0178828        | 0.0134817        |
| 11                              | 273        | 170     | 103     | 0.0174717        | 0.0083651        |
| 12                              | 236        | 178     | 58      | 0.0182939        | 0.0047105        |
| 13                              | 207        | 64      | 143     | 0.0065776        | 0.0116137        |
| 14                              | 149        | 71      | 78      | 0.0072970        | 0.0063348        |
| <b>Total</b>                    | 22043      | 9730    | 12313   | 1.0000000        | 1.0000000        |

**Table S2.** Cells per cluster and samples fractions AFs in Animal 1. Sample 2 represents the proximal AFs in Animal 1 and Sample 4 represents the distal AFs in Animal 1.

| Number of cells in each cluster |            |         |         |                  |                  |
|---------------------------------|------------|---------|---------|------------------|------------------|
| Cluster                         | # of cells | Sample2 | Sample4 | Sample2 fraction | Sample4 fraction |
| 0                               | 8930       | 3624    | 5306    | 0.3739938        | 0.3695243        |
| 1                               | 4869       | 1916    | 2953    | 0.1977296        | 0.2056550        |
| 2                               | 2564       | 1095    | 1469    | 0.1130031        | 0.1023052        |
| 3                               | 2137       | 781     | 1356    | 0.0805986        | 0.0944355        |
| 4                               | 1912       | 810     | 1102    | 0.0835913        | 0.0767463        |
| 5                               | 872        | 405     | 467     | 0.0417957        | 0.0325232        |
| 6                               | 714        | 281     | 433     | 0.0289990        | 0.0301553        |
| 7                               | 635        | 133     | 502     | 0.0137255        | 0.0349607        |
| 8                               | 473        | 204     | 269     | 0.0210526        | 0.0187339        |
| 9                               | 372        | 201     | 171     | 0.0207430        | 0.0119089        |
| 10                              | 348        | 103     | 245     | 0.0106295        | 0.0170625        |
| 11                              | 223        | 137     | 86      | 0.0141383        | 0.0059893        |
| <b>Total</b>                    | 24049      | 9690    | 14359   | 1.0000000        | 1.0000000        |

**Table S3.** Cells per cluster and samples fractions NPs Animal 2. Sample 5 represents the proximal NPs in Animal 2 and Sample 7 represents the distal NPs in Animal 2.

| Number of cells in each cluster |              |              |             |                  |                  |
|---------------------------------|--------------|--------------|-------------|------------------|------------------|
| Cluster                         | # of cells   | Sample5      | Sample7     | Sample5 fraction | Sample7 fraction |
| 0                               | 5288         | 3188         | 2100        | 0.2673599        | 0.2473207        |
| 1                               | 4495         | 3423         | 1072        | 0.2870681        | 0.1262513        |
| 2                               | 2418         | 1372         | 1046        | 0.1150621        | 0.1231893        |
| 3                               | 1770         | 275          | 1495        | 0.0230627        | 0.1760688        |
| 4                               | 1563         | 1047         | 516         | 0.0878061        | 0.0607702        |
| 5                               | 938          | 525          | 413         | 0.0440288        | 0.0486397        |
| 6                               | 852          | 458          | 394         | 0.0384099        | 0.0464021        |
| 7                               | 693          | 468          | 225         | 0.0392486        | 0.0264986        |
| 8                               | 611          | 258          | 353         | 0.0216370        | 0.0415734        |
| 9                               | 431          | 216          | 215         | 0.0181147        | 0.0253209        |
| 10                              | 428          | 184          | 244         | 0.0154311        | 0.0287363        |
| 11                              | 318          | 193          | 125         | 0.0161858        | 0.0147215        |
| 12                              | 268          | 67           | 201         | 0.0056189        | 0.0236721        |
| 13                              | 250          | 227          | 23          | 0.0190372        | 0.0027088        |
| 14                              | 92           | 23           | 69          | 0.0019289        | 0.0081263        |
| <b>Total</b>                    | <b>20415</b> | <b>11924</b> | <b>8491</b> | <b>1.0000000</b> | <b>1.0000000</b> |

**Table S4.** Cells per cluster and samples fractions AFs Animal 2. Sample 6 represents the proximal AFs in Animal 2 and Sample 8 represents the distal AFs in Animal 2.

| Number of cells in each cluster |              |              |              |                  |                  |
|---------------------------------|--------------|--------------|--------------|------------------|------------------|
| Cluster                         | # of cells   | Sample6      | Sample8      | Sample6 fraction | Sample8 fraction |
| 0                               | 8213         | 2939         | 5274         | 0.2618030        | 0.3392949        |
| 1                               | 6641         | 2965         | 3676         | 0.2641190        | 0.2364900        |
| 2                               | 2856         | 1147         | 1709         | 0.1021735        | 0.1099460        |
| 3                               | 2470         | 1307         | 1163         | 0.1164262        | 0.0748199        |
| 4                               | 1982         | 819          | 1163         | 0.0729556        | 0.0748199        |
| 5                               | 1554         | 567          | 987          | 0.0505077        | 0.0634972        |
| 6                               | 978          | 526          | 452          | 0.0468555        | 0.0290787        |
| 7                               | 875          | 421          | 454          | 0.0375022        | 0.0292074        |
| 8                               | 458          | 193          | 265          | 0.0171922        | 0.0170484        |
| 9                               | 408          | 200          | 208          | 0.0178158        | 0.0133814        |
| 10                              | 335          | 142          | 193          | 0.0126492        | 0.0124164        |
| <b>Total</b>                    | <b>26770</b> | <b>11226</b> | <b>15544</b> | <b>1.0000000</b> | <b>1.0000000</b> |

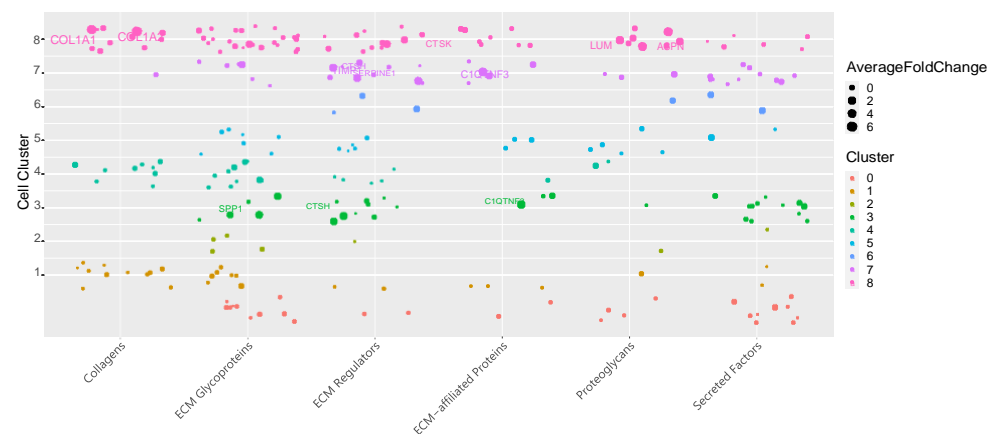

**Figure S6.** Matrisome Enrichment per cell cluster of the proximal NP of Animal 1. The x-axis of the plot shows the category of the Matrisome. The y-axis represents the cell cluster and the dot size represents the fold change of the gene expression.

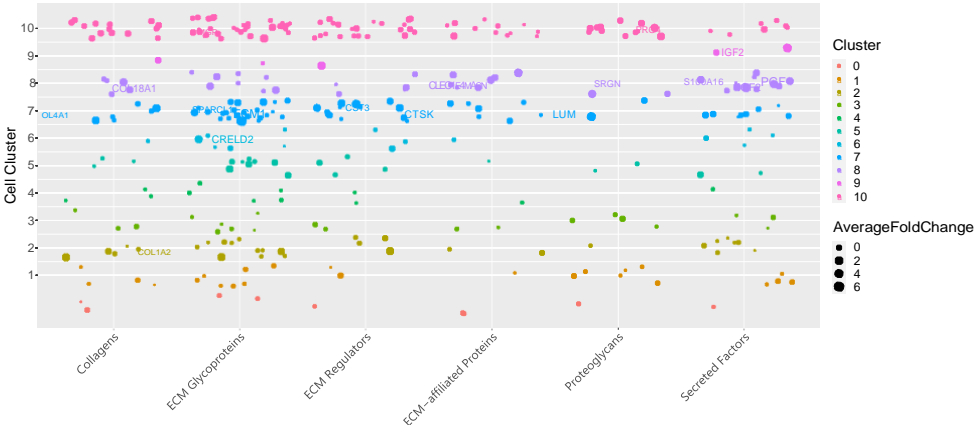

**Figure S7.** Matrisome Enrichment per cell cluster of the proximal AF of Animal 1. The *x*-axis of the plot shows the category of the Matrisome. The *y*-axis represents the cell cluster and the dot size represents the fold change of the gene expression.

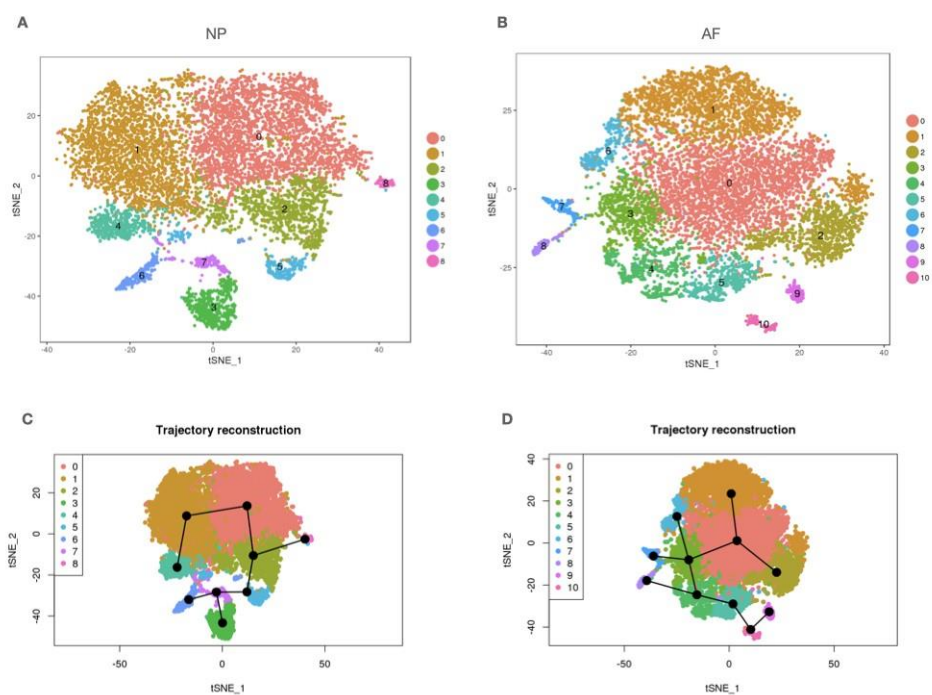

**Figure S8.** Single Sample Animal 1 NP and AF cell clusters and lineage projection. The figure depicts tSNE and trajectory plots of the NPs and AFs of Animal 1: **(A)** the tSNE plot and the cell clusters identified in the NP; **(B)** the tSNE plot and the cell clusters identified in the AF; **(C)** the reconstructed lineage trajectory of the NP cell clusters; and **(D)** the reconstructed lineage trajectory of the AF cell clusters.

**Table S5.** Common markers between scRNAseq and bulkRNAseq. The genes that are present in the list of typical genes for the NPCs or AFCs in the scRNAseq and bulkRNAseq data. Based on a gene comparison of the results depicted in Figures 9 and 11 only a limited number of genes matches.

| Proximal NPs Animal1 Bulk and scRNAseq | Proximal AFs Animal1 Bulk and scRNAseq |
|----------------------------------------|----------------------------------------|
| CD96                                   | PTPPR                                  |
| FLT1                                   | BMP4                                   |
| PTGR1                                  | ADGRL2                                 |
| BFAR                                   | TM4SF18                                |
| DUSP26                                 | PTPRB                                  |
| ATG4A                                  | ROBO4                                  |
| F2RL2                                  | PLVAP                                  |
| PAK1                                   | CALCRL                                 |
| PCDH7                                  | LGALS9                                 |
| FZD2                                   | RSAD2                                  |
| SOSTDC1                                | ADGRF5                                 |
| KRT18                                  | EMCN                                   |
| CHST4                                  | ADGRL4                                 |
| ADGRD1                                 | CLEC14A                                |
| KIAA1217                               | PECAM1                                 |
| AP3B2                                  | SPRY1                                  |
| TMEM163                                | CXCL16                                 |
| KYAT3                                  | RNASE4                                 |
| PKP2                                   | FGF7                                   |
| C3orf49                                | LHFPL2                                 |
| KRT19                                  | CRABP2                                 |
| CDH2                                   | TFPI2                                  |
| DSP                                    | SERPINF1                               |
| DDR1                                   | FBLN1                                  |
| PDE1A                                  |                                        |
| KRT8                                   |                                        |
| ATP6V1G3                               |                                        |
